# Supplementary material
Source: PubMed Central journal article supplement (PMC3955170)

## Supplementary Figure S1

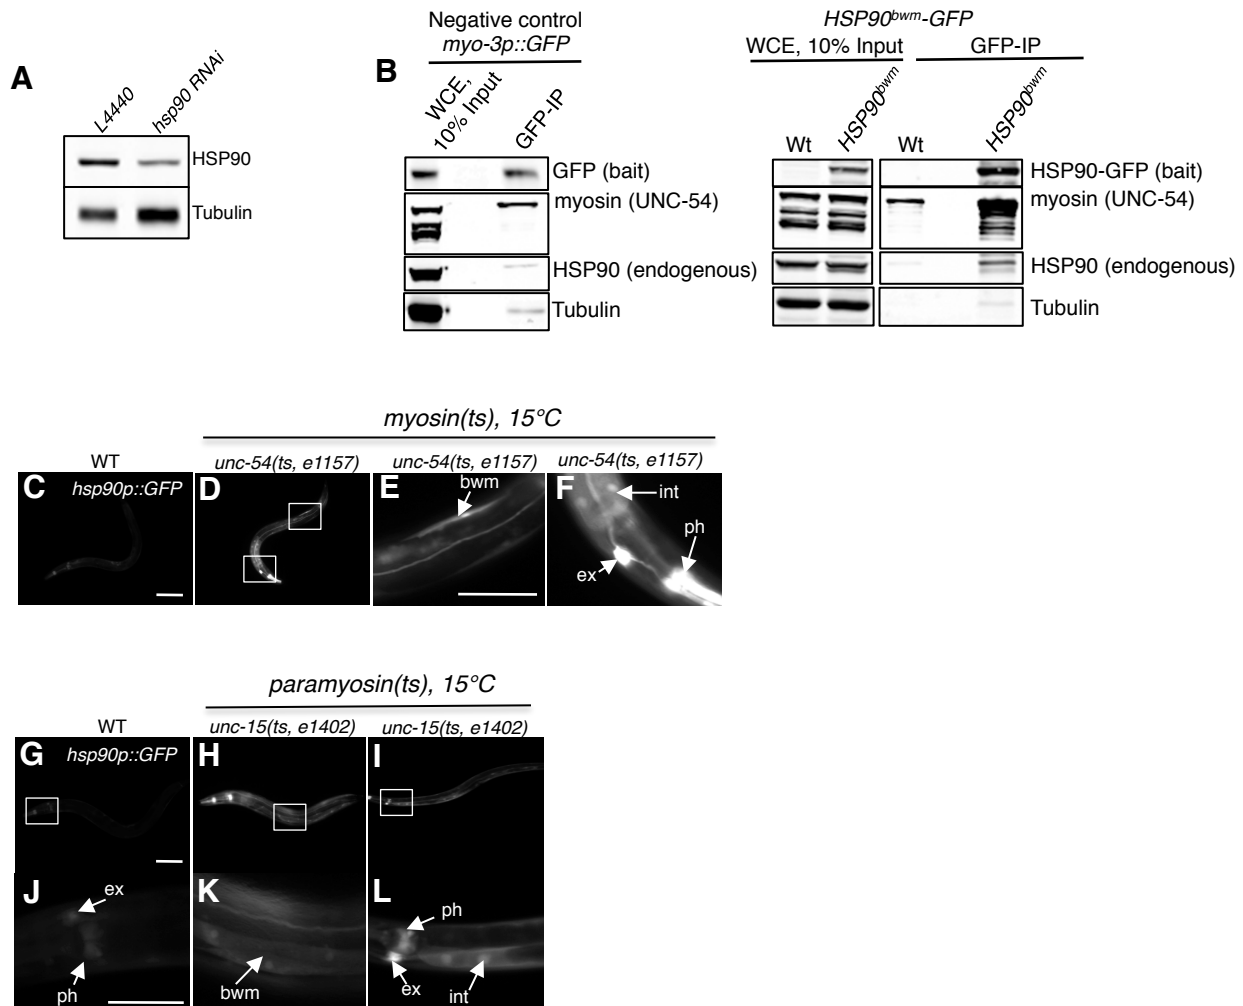

## Supplementary Figure S2

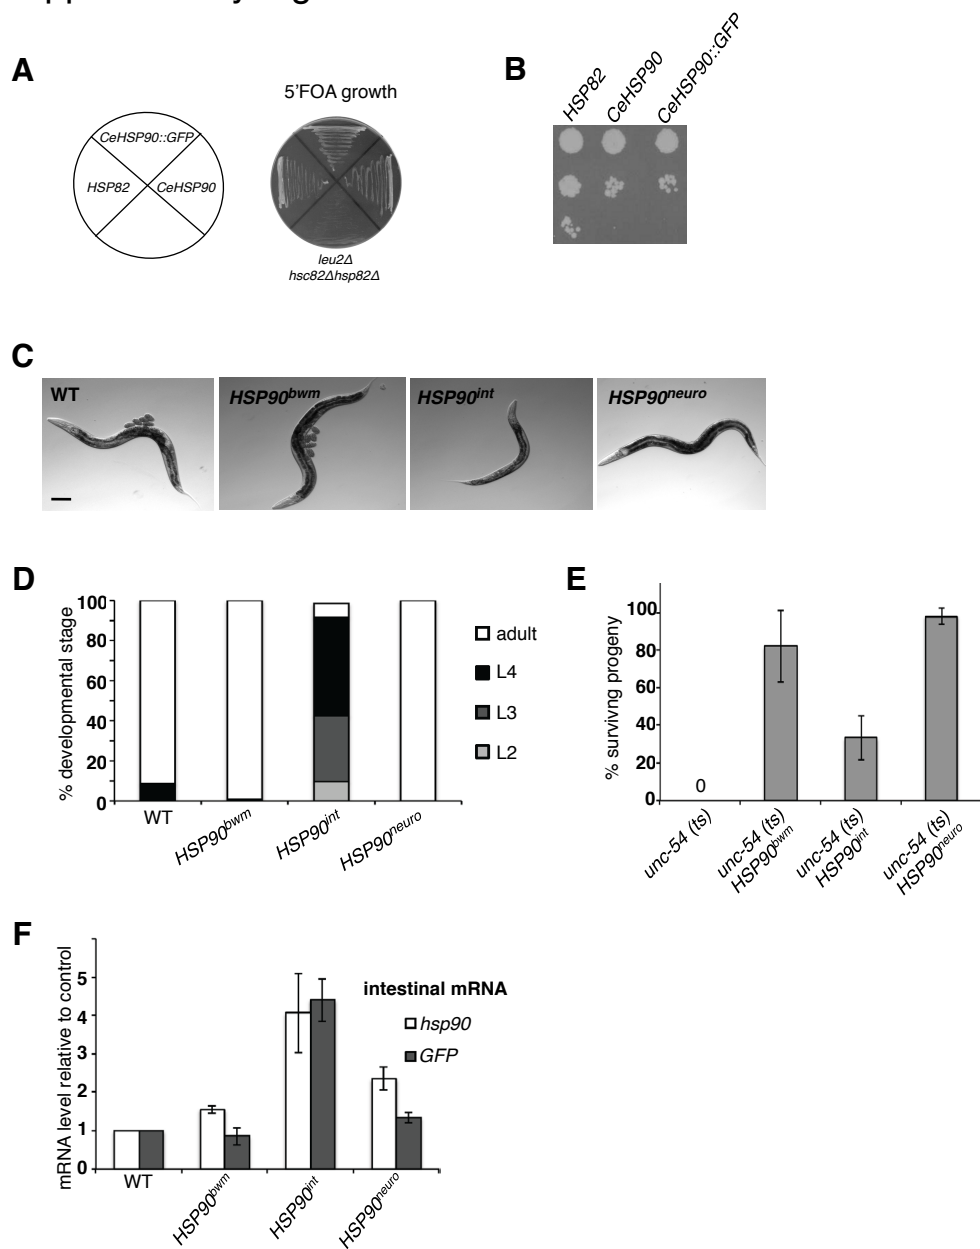

### Supplementary Figure S3

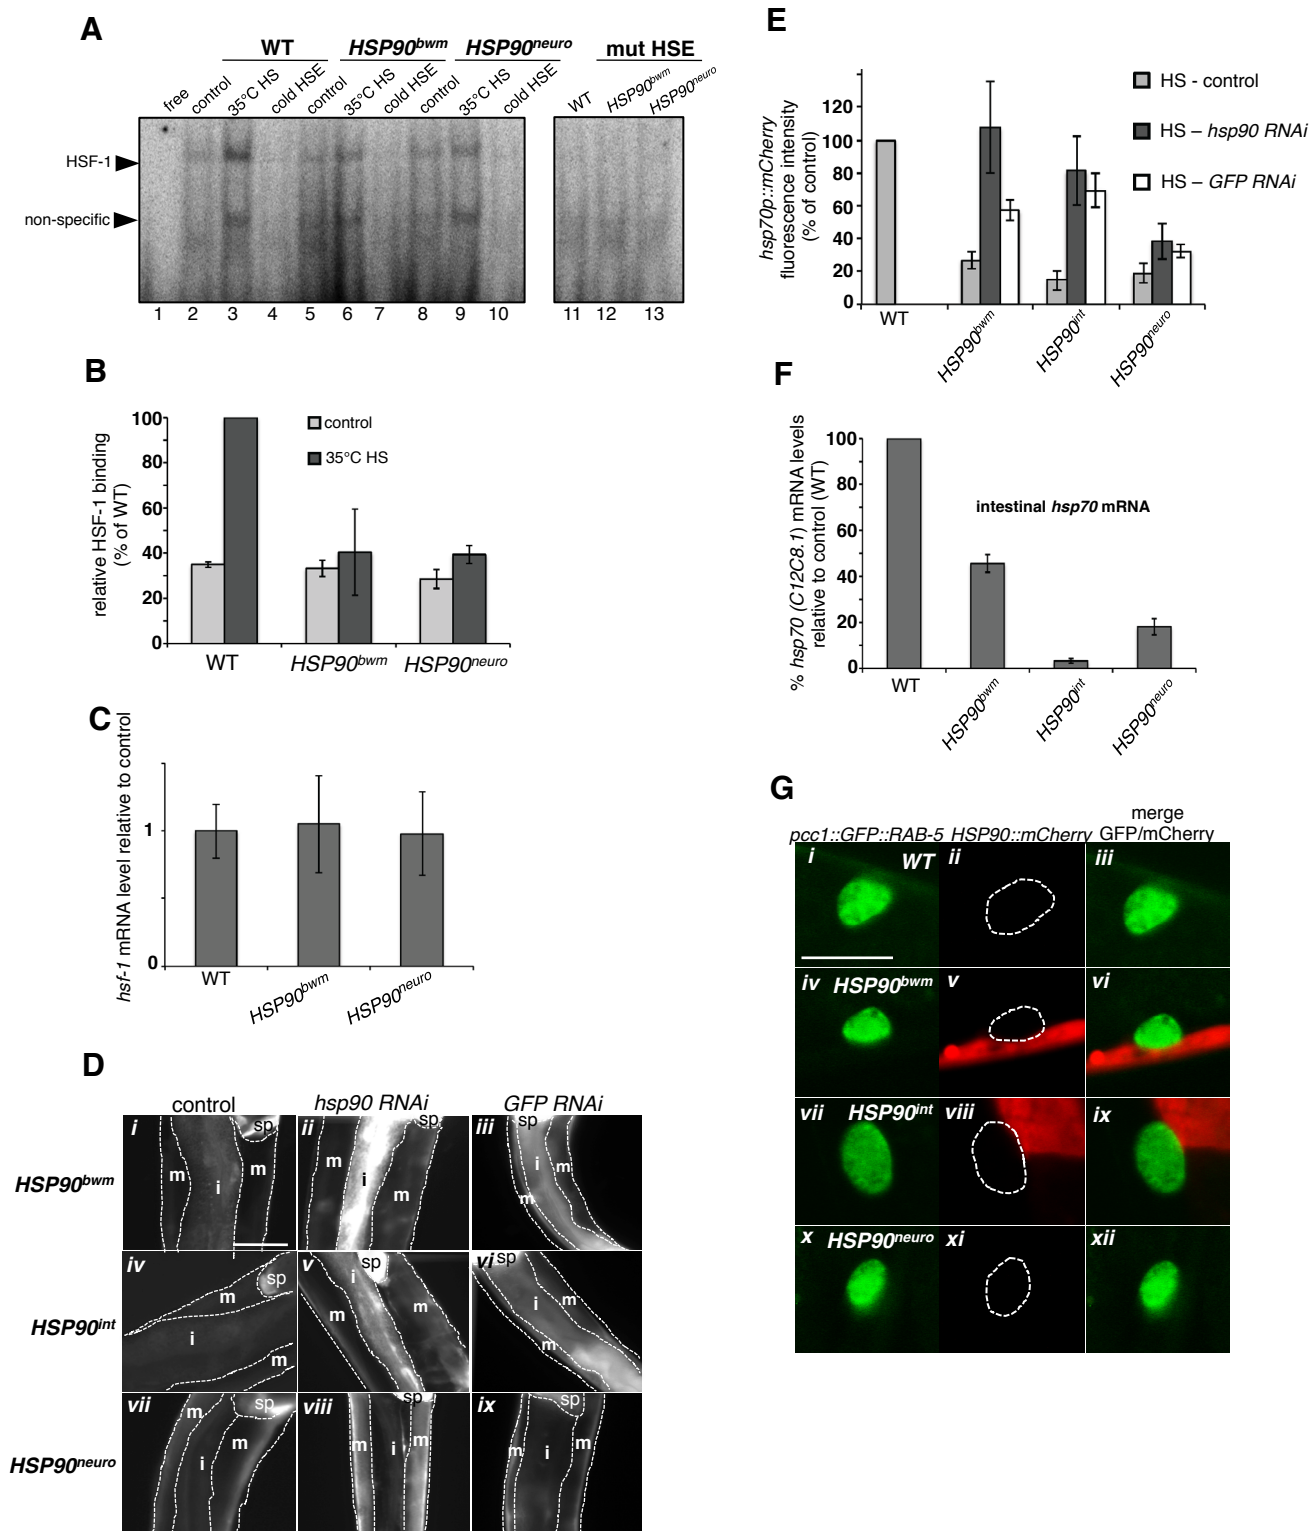

Supplementary Figure S4

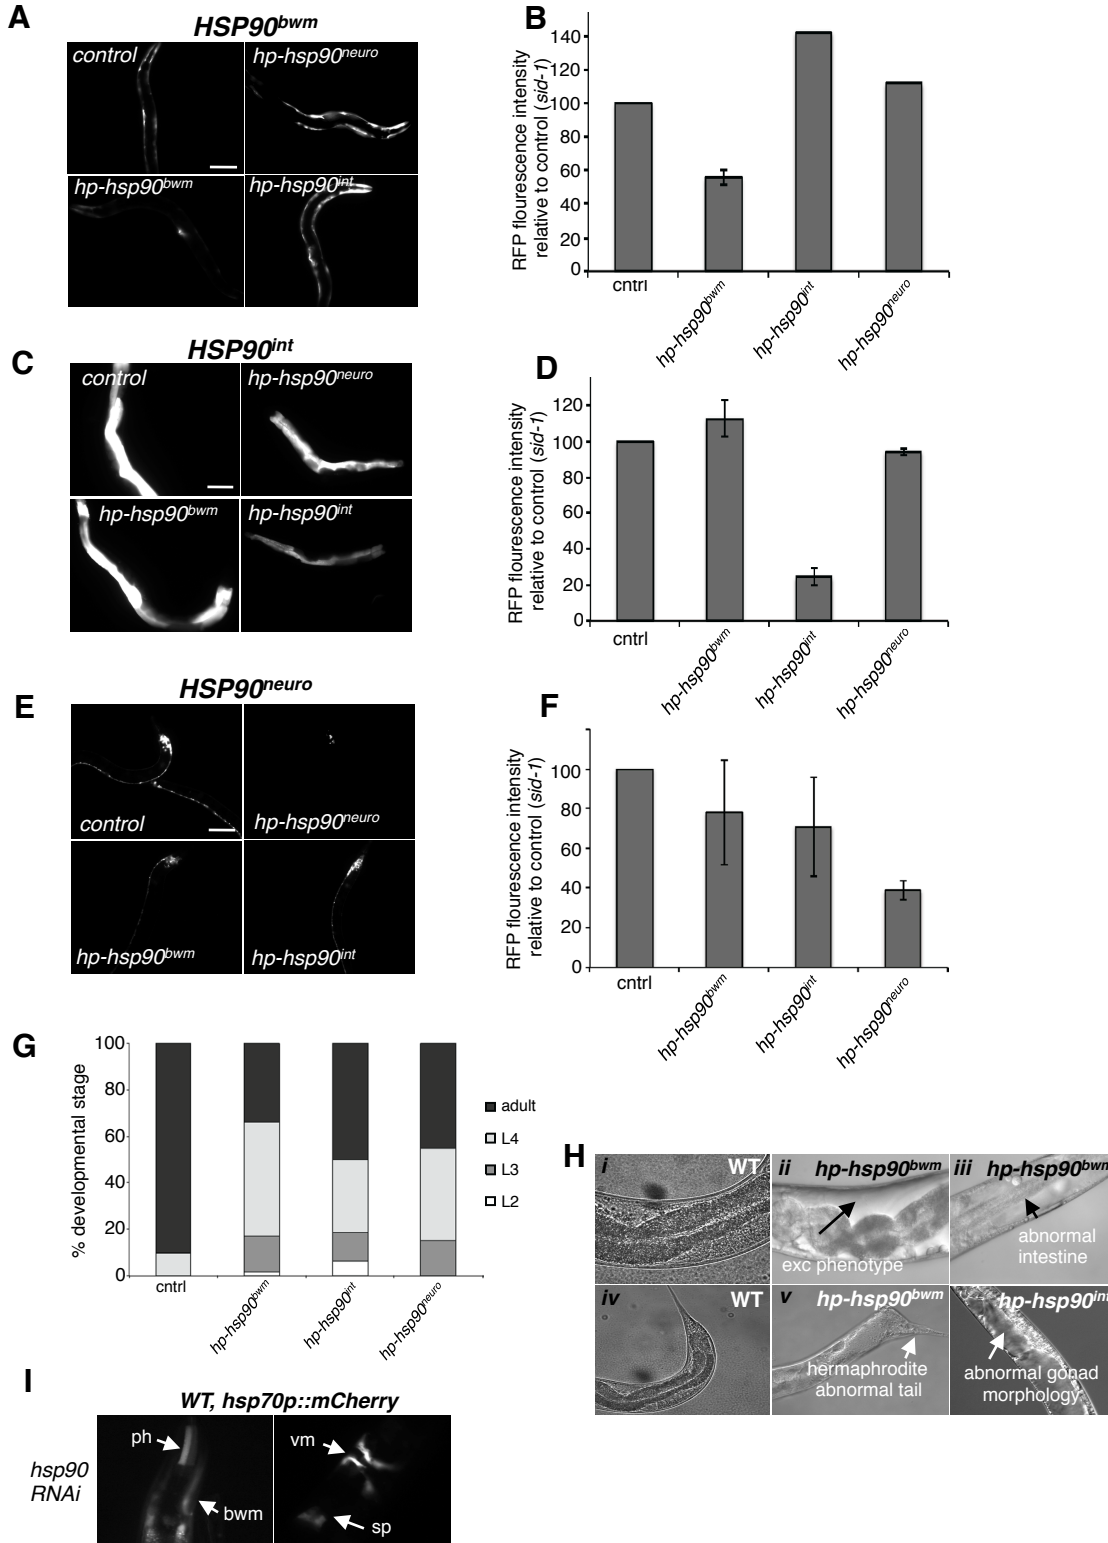

Supplementary Figure S5

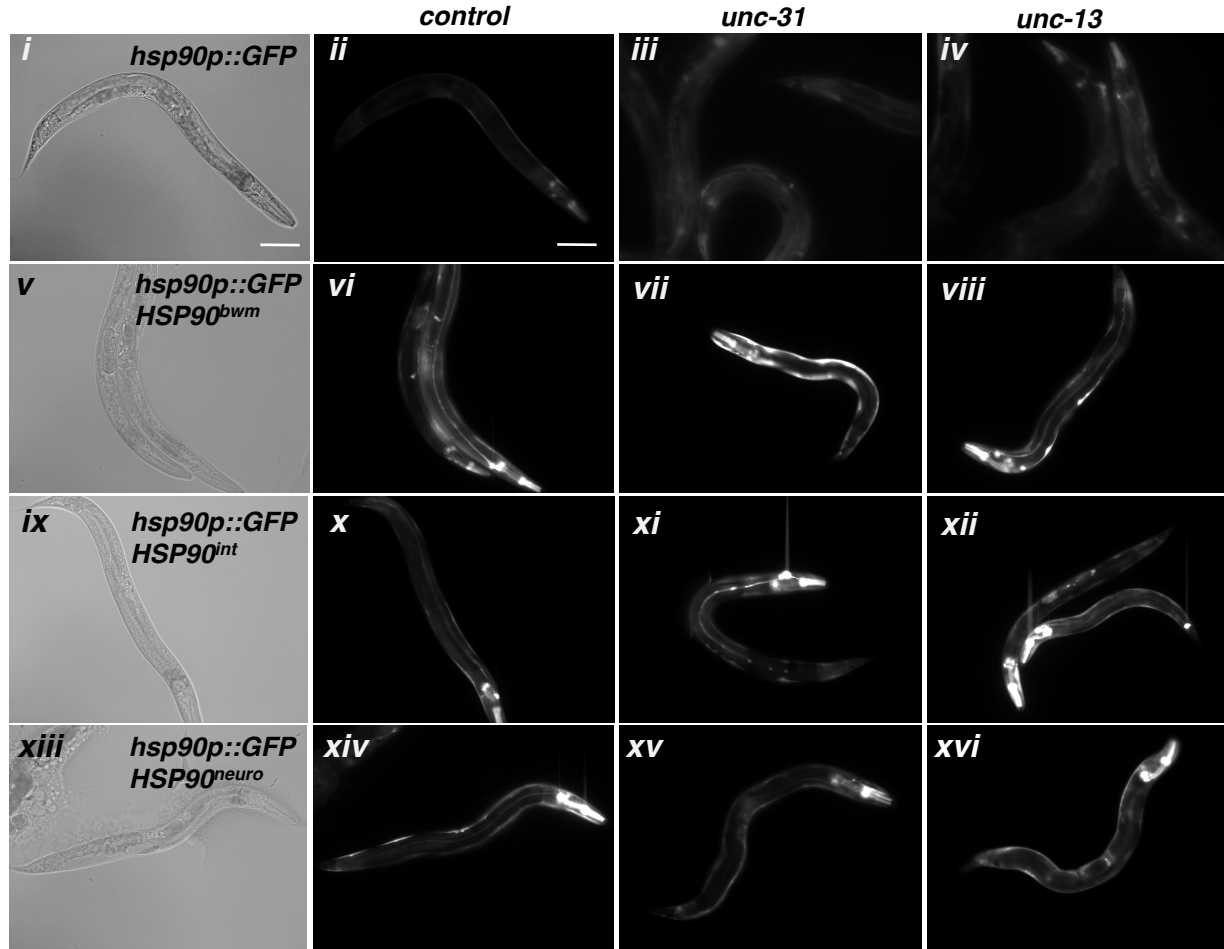

Supplementary Figure S6

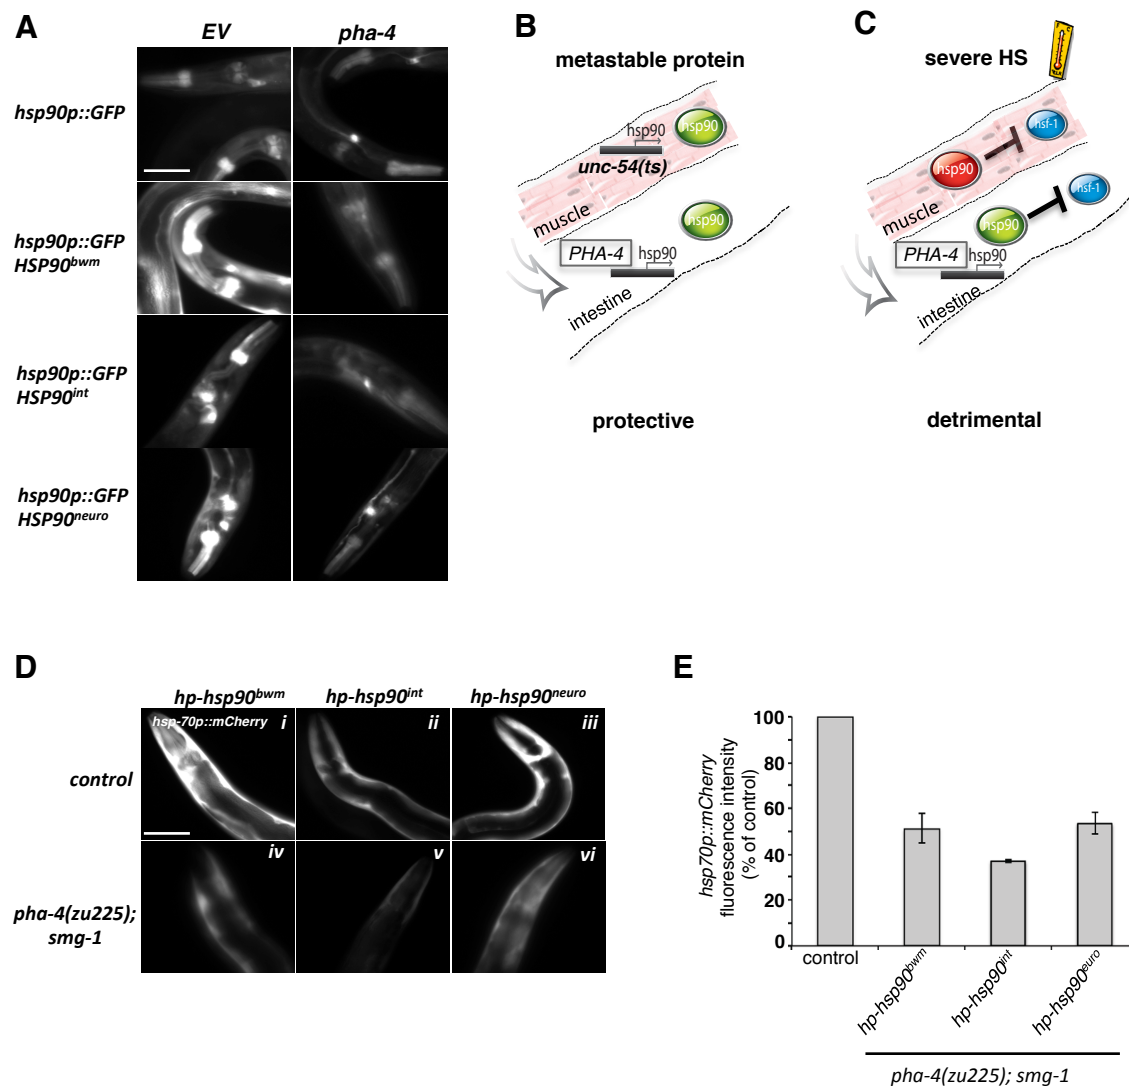

Supplement: NIHMS479779-supplement-02.pdf [file NIHMS479779-supplement-02.pdf]
